# Supplementary material
Source: publisher site journal article supplement (https://www.dovepress.com/article/409767)
Supplement: Supplementary file 1 [file get_supplementary_file.php]

# Supplementary Materials

Table S1: List of potential attributes

| Adverse event: diarrhea | Need for titration period |
| --- | --- |
| Adverse event: nausea | Ease of taking the pill (pill size) |
| Adverse event: vomiting | Number of pills taken per day |
| Adverse event: risk of MI | Tested and approved in three indications v one |
| Adverse event: bleeding | Efficacy (slowdown of disease) |
| Adverse event: cough | Efficacy (number of exacerbations) |
| Adverse event: fatigue | Clarity of mechanism of action |
| Adverse event: photosensitivity reaction | Interaction profile with tobacco products |
| Adverse event: hepatic enzyme changes | Interaction profile with other drugs or food |
| Ease of prescription |  |

Table S2: Example patient and caregiver DCE choice set.

| **Attribute** | **Drug A** | **Drug B** |
| --- | --- | --- |
| **Slowdown of disease:** How well the treatment slows down the progression of IPF | Disease progression reversed | Disease progression unchanged |
| Survival: Whether the treatment has an impact on life expectancy | No survival benefit | No survival benefit |
| **Number of exacerbations:** Whether the treatment has an impact on the number of IPF exacerbations experienced | Reduction in number of exacerbations | Reduction in number of exacerbations |
| **Adverse event – diarrhea:** Whether the treatment causes diarrhea, and, if so, the impact of diarrhea on daily life | Severe diarrhea, or hard to manage in daily life | Severe diarrhea, or hard to manage in daily life |
| **Adverse event – sun sensitivity:** Whether the treatment causes sun sensitivity, and, if so, the impact of sun sensitivity on daily life | Sun sensitivity that restricts outside activities by time-of-day despite sun cream and clothing | Sun sensitivity that restricts outside activities by time-of-day despite sun cream and clothing |
| **Adverse event – nausea:** whether the treatment causes nausea, and, if so, the impact of nausea reaction on daily life | Severe nausea, or hard to manage in daily life | Mild or moderate nausea, but manageable in daily life |

Table S3: Example pulmonologist DCE choice set.

| **Attribute** | **Drug A** | **Drug B** |
| --- | --- | --- |
| **Slowdown of disease:** How well the treatment slows down the progression of IPF | Improvement of lung function | Stabilization of lung function |
| **Number of exacerbations:** Whether the treatment has an impact on the number of IPF exacerbations experienced | Exacerbation despite treatment | No exacerbation |
| **Adverse event – gastro-intestinal effects:** Whether the treatment causes diarrhea and nausea, and, if so, the impact of diarrhea on daily life | GI effects causing a large impact on quality of life but patient feels better with reduced dose | GI effects causing a large impact on quality of life and discontinuation of medication |
| **Adverse event – photosensitivity reaction:** Whether the treatment causes photosensitivity reaction, and, if so, the impact of photosensitivity reaction on daily life | Photosensitivity reaction, but low impact on daily life and continuation of medication | Photosensitivity reaction, causing a large impact on quality of daily life and patient feels better with a reduced dose |
| **Initial prescription and titration period:** How simple the initial prescription period is for a treatment, and whether it requires a titration period | Straight-forward titration period and only one dosage | No titration period and only one dosage |

Figure S1: Univariate analysis: Patient DCE coefficients by sex.


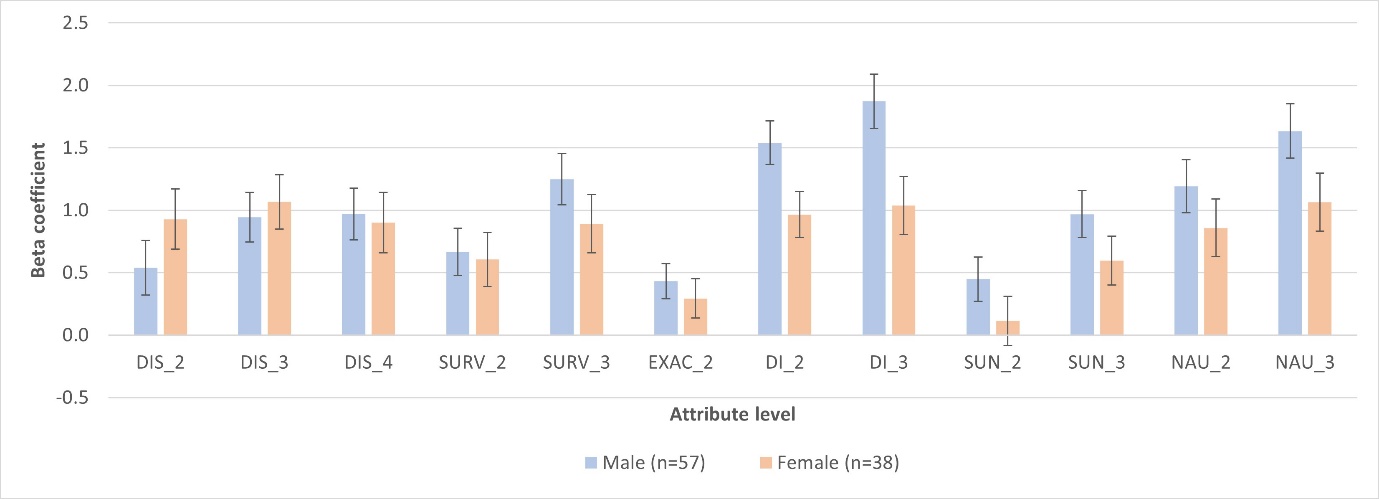


Figure S1: DI_2 mild or moderate diarrhea, manageable daily life; DI_3 no diarrhea; DIS_2 disease progression slower; DIS_3 disease progression stopped; DIS-4 disease progression reversed; EXAC_2, reduction in exacerbations; F, female M, male; NAU_2, mild or moderate nausea but manageable daily life; NAU_3, no nausea; SUN_2, sun sensitivity manageable with sun cream/clothing; SUN_3, no sun sensitivity; SURV_2, Up to one year longer life; SURV_3 more than one year longer life.

Figure S2: Univariate analysis: Patient DCE coefficients by age category.


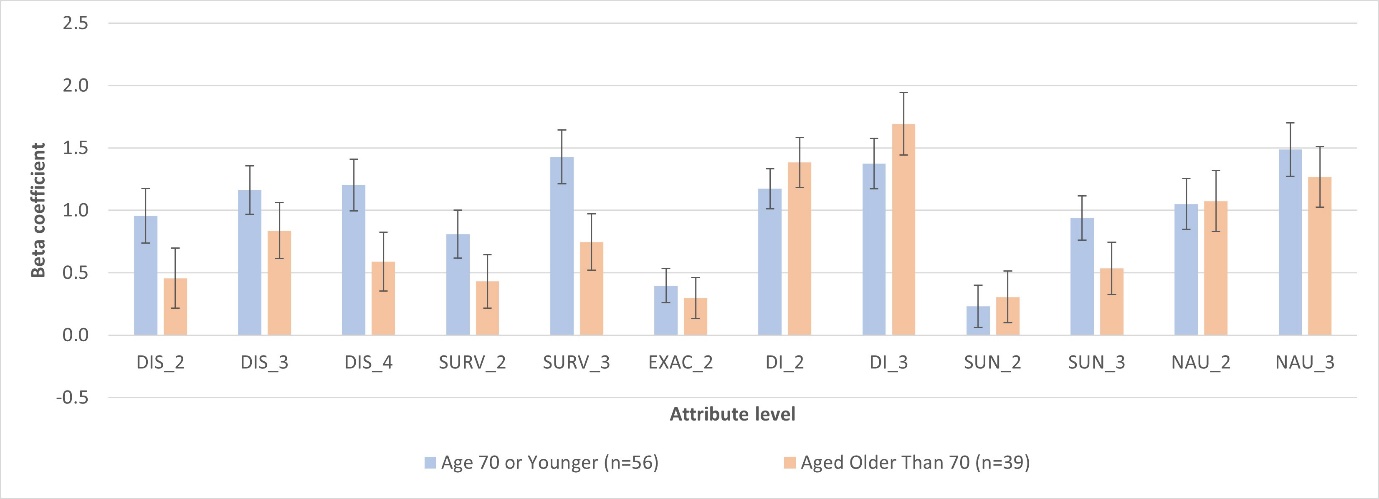


Figure S2: DI_2 mild or moderate diarrhea, manageable daily life; DI_3 no diarrhea; DIS_2 disease progression slower; DIS_3 disease progression stopped; DIS-4 disease progression reversed; EXAC_2, reduction in exacerbations; NAU_2, mild or moderate nausea but manageable daily life; NAU_3, no nausea; SUN_2, sun sensitivity manageable with sun cream/clothing; SUN_3, no sun sensitivity; SURV_2, Up to one year longer life; SURV_3 more than one year longer life.

Figure S3: Univariate analysis: Patient DCE coefficients by current antifibrotic medication.


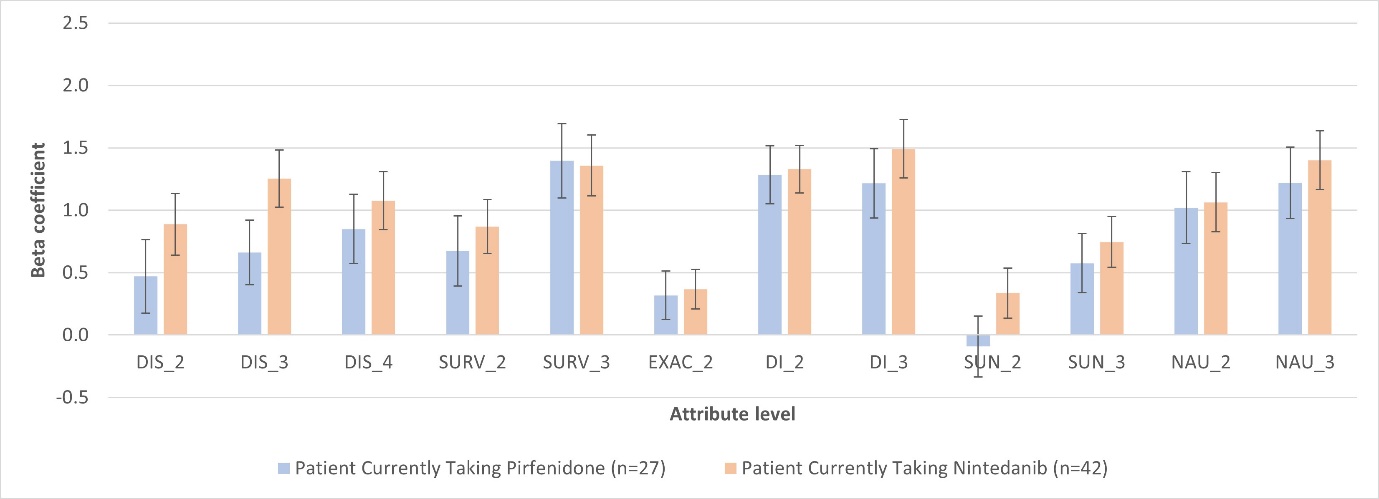


Figure S3: DI_2 mild or moderate diarrhea, manageable daily life; DI_3 no diarrhea; DIS_2 disease progression slower; DIS_3 disease progression stopped; DIS-4 disease progression reversed; EXAC_2, reduction in exacerbations; NAU_2, mild or moderate nausea but manageable daily life; NAU_3, no nausea; SUN_2, sun sensitivity manageable with sun cream/clothing; SUN_3, no sun sensitivity; SURV_2, Up to one year longer life; SURV_3 more than one year longer life.

Figure S4: Univariate analysis: Patient DCE coefficients by disease severity.


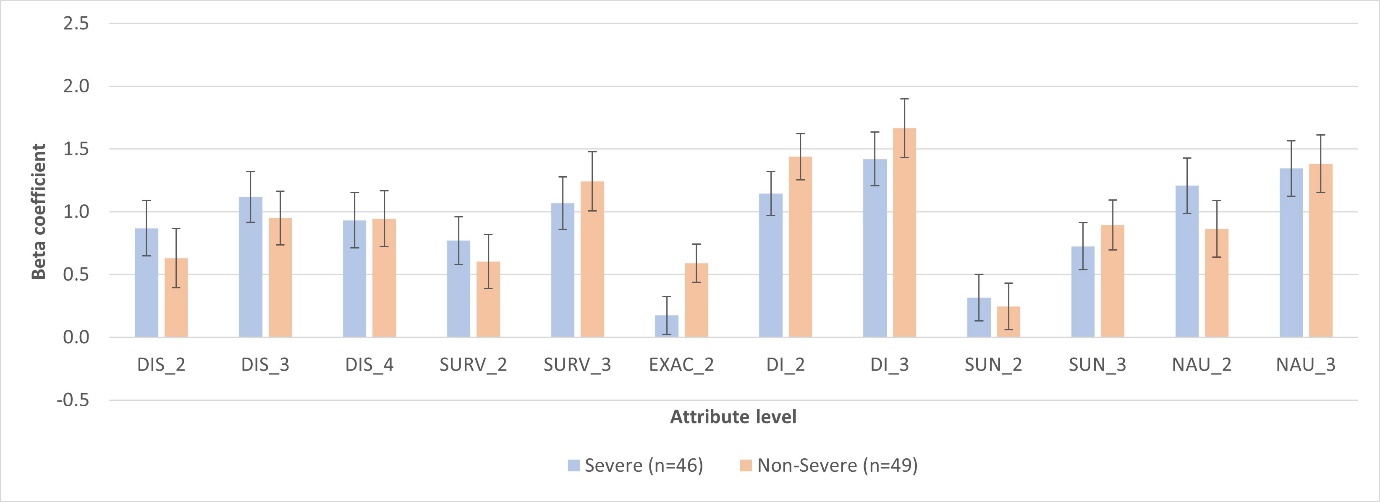


Figure S4: DI_2 mild or moderate diarrhea, manageable daily life; DI_3 no diarrhea; DIS_2 disease progression slower; DIS_3 disease progression stopped; DIS-4 disease progression reversed; EXAC_2, reduction in exacerbations; NAU_2, mild or moderate nausea but manageable daily life; NAU_3, no nausea; NS, not severe; S, severe; SUN_2, sun sensitivity manageable with sun cream/clothing; SUN_3, no sun sensitivity; SURV_2, Up to one year longer life; SURV_3 more than one year longer life.
